# Supplementary material for: Genetic Polymorphism of ADORA2A Is Associated With the Risk of Epilepsy and Predisposition to Neurologic Comorbidity in Chinese Southern Children
Source: PubMed Central journal article supplement (PMC7686584; doi:10.3389/fnins.2020.590605), 2020-11-11
Supplement: Data_Sheet_1.pdf [file Data_Sheet_1.pdf]

## Supplementary data

Table 3. The ADORA2A rs2298383 genotype of healthy children and CE patients in this study.

| <b>Control group (n = 244)</b> |          | <b>Case group (n = 200)</b> |          |    |    |
|--------------------------------|----------|-----------------------------|----------|----|----|
| No.                            | Genotype | No.                         | Genotype | NC | DC |
| 1                              | CT       | 1                           | CT       |    |    |
| 2                              | CC       | 2                           | CT       |    |    |
| 3                              | TT       | 3                           | CC       |    |    |
| 4                              | CT       | 4                           | CT       |    |    |
| 5                              | TT       | 5                           | CT       |    |    |
| 6                              | CT       | 6                           | CC       |    |    |
| 7                              | CT       | 7                           | TT       |    |    |
| 8                              | CT       | 8                           | CT       |    |    |
| 9                              | TT       | 9                           | CT       |    |    |
| 10                             | TT       | 10                          | TT       |    |    |
| 11                             | CT       | 11                          | CT       |    |    |
| 12                             | CT       | 12                          | CC       |    |    |
| 13                             | CT       | 13                          | CT       |    |    |
| 14                             | TT       | 14                          | CT       |    |    |
| 15                             | CC       | 15                          | CT       |    |    |
| 16                             | CT       | 16                          | CC       |    |    |
| 17                             | CC       | 17                          | TT       |    |    |
| 18                             | CT       | 18                          | CT       |    |    |
| 19                             | TT       | 19                          | CT       |    |    |
| 20                             | TT       | 20                          | CT       |    |    |
| 21                             | TT       | 21                          | CT       |    |    |
| 22                             | TT       | 22                          | TT       |    |    |
| 23                             | TT       | 23                          | CC       |    |    |
| 24                             | CC       | 24                          | TT       |    |    |
| 25                             | TT       | 25                          | CT       |    |    |
| 26                             | CT       | 26                          | CC       |    |    |
| 27                             | CC       | 27                          | CT       |    |    |
| 28                             | CT       | 28                          | CC       |    |    |
| 29                             | TT       | 29                          | TT       |    |    |
| 30                             | TT       | 30                          | TT       |    |    |
| 31                             | CC       | 31                          | CT       |    |    |
| 32                             | TT       | 32                          | CT       |    |    |
| 33                             | CT       | 33                          | CT       |    |    |
| 34                             | TT       | 34                          | CT       |    |    |
| 35                             | TT       | 35                          | CC       |    |    |
| 36                             | TT       | 36                          | CT       |    |    |

| <b>Control group (n = 244)</b> |          | <b>Case group (n = 200)</b> |          |    |    |
|--------------------------------|----------|-----------------------------|----------|----|----|
| No.                            | Genotype | No.                         | Genotype | NC | DC |
| 37                             | CC       | 37                          | CT       |    |    |
| 38                             | CT       | 38                          | CT       |    |    |
| 39                             | TT       | 39                          | CT       |    |    |
| 40                             | TT       | 40                          | CT       |    |    |
| 41                             | TT       | 41                          | CT       |    |    |
| 42                             | CT       | 42                          | TT       |    |    |
| 43                             | CC       | 43                          | CT       |    |    |
| 44                             | CC       | 44                          | CT       |    |    |
| 45                             | CC       | 45                          | CT       |    |    |
| 46                             | CC       | 46                          | CT       |    |    |
| 47                             | TT       | 47                          | CT       |    |    |
| 48                             | CC       | 48                          | TT       |    |    |
| 49                             | CC       | 49                          | CC       |    |    |
| 50                             | CT       | 50                          | CT       |    |    |
| 51                             | CC       | 51                          | CT       |    |    |
| 52                             | CT       | 52                          | TT       |    |    |
| 53                             | CT       | 53                          | CC       |    |    |
| 54                             | CT       | 54                          | TT       |    |    |
| 55                             | CT       | 55                          | CT       |    |    |
| 56                             | CC       | 56                          | CC       |    |    |
| 57                             | TT       | 57                          | CT       |    |    |
| 58                             | CC       | 58                          | CT       |    |    |
| 59                             | CT       | 59                          | CT       |    |    |
| 60                             | CT       | 60                          | CC       |    |    |
| 61                             | CT       | 61                          | TT       |    |    |
| 62                             | TT       | 62                          | CT       |    |    |
| 63                             | TT       | 63                          | CC       |    |    |
| 64                             | CT       | 64                          | CC       |    |    |
| 65                             | CC       | 65                          | CT       |    |    |
| 66                             | CT       | 66                          | CT       |    |    |
| 67                             | TT       | 67                          | CT       |    |    |
| 68                             | CT       | 68                          | CT       |    |    |
| 69                             | TT       | 69                          | TT       |    |    |
| 70                             | TT       | 70                          | CC       |    |    |
| 71                             | CC       | 71                          | CT       |    |    |
| 72                             | CT       | 72                          | CT       |    |    |
| 73                             | TT       | 73                          | CC       |    |    |
| 74                             | CT       | 74                          | TT       |    |    |
| 75                             | CC       | 75                          | CT       |    |    |
| 76                             | CT       | 76                          | CT       |    |    |
| 77                             | TT       | 77                          | CT       |    |    |
| 78                             | CC       | 78                          | CT       |    |    |

| Control group (n = 244) |          | Case group (n = 200) |          |    |    |
|-------------------------|----------|----------------------|----------|----|----|
| No.                     | Genotype | No.                  | Genotype | NC | DC |
| 79                      | TT       | 79                   | CT       |    |    |
| 80                      | CT       | 80                   | CC       |    |    |
| 81                      | CT       | 81                   | CT       |    |    |
| 82                      | CT       | 82                   | CT       |    |    |
| 83                      | TT       | 83                   | CT       |    |    |
| 84                      | CT       | 84                   | CT       |    |    |
| 85                      | CT       | 85                   | CT       |    |    |
| 86                      | CC       | 86                   | CT       |    |    |
| 87                      | CT       | 87                   | CT       |    |    |
| 88                      | CC       | 88                   | CC       |    |    |
| 89                      | CT       | 89                   | CT       |    |    |
| 90                      | CT       | 90                   | TT       |    |    |
| 91                      | CT       | 91                   | CC       |    |    |
| 92                      | TT       | 92                   | CT       |    |    |
| 93                      | CT       | 93                   | CC       |    |    |
| 94                      | CT       | 94                   | TT       |    |    |
| 95                      | CT       | 95                   | TT       |    |    |
| 96                      | TT       | 96                   | CC       |    |    |
| 97                      | CT       | 97                   | TT       |    |    |
| 98                      | CC       | 98                   | CT       |    |    |
| 99                      | CT       | 99                   | CT       |    |    |
| 100                     | CC       | 100                  | CT       |    |    |
| 101                     | TT       | 101                  | CT       |    |    |
| 102                     | CT       | 102                  | CT       |    |    |
| 103                     | TT       | 103                  | CT       |    |    |
| 104                     | CT       | 104                  | TT       |    |    |
| 105                     | CT       | 105                  | TT       |    |    |
| 106                     | CC       | 106                  | CT       | √  | √  |
| 107                     | TT       | 107                  | CT       | √  | √  |
| 108                     | CT       | 108                  | CC       | √  | √  |
| 109                     | CT       | 109                  | CC       | √  | √  |
| 110                     | TT       | 110                  | CT       | √  | √  |
| 111                     | CT       | 111                  | CC       | √  | √  |
| 112                     | TT       | 112                  | CC       | √  | √  |
| 113                     | CC       | 113                  | CC       | √  | √  |
| 114                     | CT       | 114                  | CC       | √  | √  |
| 115                     | TT       | 115                  | CT       | √  | √  |
| 116                     | TT       | 116                  | CT       | √  | √  |
| 117                     | CT       | 117                  | CT       | √  | √  |
| 118                     | TT       | 118                  | CT       | √  | √  |
| 119                     | TT       | 119                  | TT       | √  | √  |
| 120                     | CC       | 120                  | TT       | √  | √  |

| Control group (n = 244) |          | Case group (n = 200) |          |    |    |
|-------------------------|----------|----------------------|----------|----|----|
| No.                     | Genotype | No.                  | Genotype | NC | DC |
| 121                     | CC       | 121                  | CC       | √  | √  |
| 122                     | CT       | 122                  | CT       | √  | √  |
| 123                     | TT       | 123                  | CC       | √  | √  |
| 124                     | TT       | 124                  | CT       | √  | √  |
| 125                     | CC       | 125                  | CC       | √  | √  |
| 126                     | CC       | 126                  | CC       | √  | √  |
| 127                     | CT       | 127                  | CT       | √  | √  |
| 128                     | CT       | 128                  | CC       | √  | √  |
| 129                     | CT       | 129                  | TT       | √  | √  |
| 130                     | CC       | 130                  | CC       | √  | √  |
| 131                     | CC       | 131                  | CT       | √  | √  |
| 132                     | CC       | 132                  | TT       | √  | √  |
| 133                     | CC       | 133                  | CC       | √  | √  |
| 134                     | CT       | 134                  | CT       | √  | √  |
| 135                     | CC       | 135                  | CT       | √  | √  |
| 136                     | CT       | 136                  | CT       | √  | √  |
| 137                     | CT       | 137                  | CT       | √  | √  |
| 138                     | TT       | 138                  | CT       | √  | √  |
| 139                     | TT       | 139                  | CT       | √  | √  |
| 140                     | CT       | 140                  | CC       | √  | √  |
| 141                     | CC       | 141                  | CT       | √  | √  |
| 142                     | CT       | 142                  | CC       |    | √  |
| 143                     | CT       | 143                  | CC       |    | √  |
| 144                     | CT       | 144                  | CC       |    | √  |
| 145                     | CC       | 145                  | CT       |    | √  |
| 146                     | CT       | 146                  | TT       |    | √  |
| 147                     | TT       | 147                  | CT       |    | √  |
| 148                     | CC       | 148                  | TT       |    | √  |
| 149                     | CT       | 149                  | TT       |    | √  |
| 150                     | TT       | 150                  | CT       |    | √  |
| 151                     | CT       | 151                  | CT       |    | √  |
| 152                     | CT       | 152                  | TT       |    | √  |
| 153                     | CT       | 153                  | CT       |    | √  |
| 154                     | CC       | 154                  | CC       |    | √  |
| 155                     | CC       | 155                  | TT       |    | √  |
| 156                     | CT       | 156                  | CT       |    | √  |
| 157                     | CC       | 157                  | TT       |    | √  |
| 158                     | CT       | 158                  | CT       |    | √  |
| 159                     | CT       | 159                  | CT       |    | √  |
| 160                     | TT       | 160                  | CT       |    | √  |
| 161                     | CT       | 161                  | CT       |    | √  |
| 162                     | CT       | 162                  | CT       |    | √  |

| Control group (n = 244) |          | Case group (n = 200) |          |    |    |
|-------------------------|----------|----------------------|----------|----|----|
| No.                     | Genotype | No.                  | Genotype | NC | DC |
| 163                     | CC       | 163                  | CC       |    | √  |
| 164                     | TT       | 164                  | CT       |    | √  |
| 165                     | CC       | 165                  | CT       |    | √  |
| 166                     | TT       | 166                  | CT       |    | √  |
| 167                     | CC       | 167                  | CT       |    | √  |
| 168                     | TT       | 168                  | CC       |    | √  |
| 169                     | CC       | 169                  | CT       |    | √  |
| 170                     | CT       | 170                  | TT       |    | √  |
| 171                     | CC       | 171                  | CC       |    | √  |
| 172                     | CT       | 172                  | TT       |    | √  |
| 173                     | CC       | 173                  | CT       |    | √  |
| 174                     | CT       | 174                  | CT       |    | √  |
| 175                     | CT       | 175                  | CC       |    | √  |
| 176                     | CC       | 176                  | CT       |    | √  |
| 177                     | CT       | 177                  | CT       |    | √  |
| 178                     | CT       | 178                  | CC       |    | √  |
| 179                     | CT       | 179                  | CT       |    | √  |
| 180                     | CT       | 180                  | TT       |    | √  |
| 181                     | CT       | 181                  | CC       |    | √  |
| 182                     | CT       | 182                  | CT       |    | √  |
| 183                     | CC       | 183                  | CT       |    | √  |
| 184                     | CT       | 184                  | CT       |    | √  |
| 185                     | CC       | 185                  | CC       |    | √  |
| 186                     | TT       | 186                  | CT       |    | √  |
| 187                     | CT       | 187                  | CC       |    | √  |
| 188                     | CT       | 188                  | CT       | √  |    |
| 189                     | CT       | 189                  | CC       | √  |    |
| 190                     | CT       | 190                  | CC       | √  |    |
| 191                     | CT       | 191                  | CT       | √  |    |
| 192                     | CT       | 192                  | CT       | √  |    |
| 193                     | CC       | 193                  | CC       | √  |    |
| 194                     | TT       | 194                  | CT       | √  |    |
| 195                     | CC       | 195                  | CT       | √  |    |
| 196                     | TT       | 196                  | CC       | √  |    |
| 197                     | CC       | 197                  | CT       | √  |    |
| 198                     | TT       | 198                  | CC       | √  |    |
| 199                     | TT       | 199                  | CT       | √  |    |
| 200                     | TT       | 200                  | CC       | √  |    |
| 201                     | CC       |                      |          |    |    |
| 202                     | CT       |                      |          |    |    |
| 203                     | CC       |                      |          |    |    |
| 204                     | TT       |                      |          |    |    |

| <b>Control group (n = 244)</b> |          | <b>Case group (n = 200)</b> |          |    |    |
|--------------------------------|----------|-----------------------------|----------|----|----|
| No.                            | Genotype | No.                         | Genotype | NC | DC |
| 205                            | CT       |                             |          |    |    |
| 206                            | CC       |                             |          |    |    |
| 207                            | CT       |                             |          |    |    |
| 208                            | CT       |                             |          |    |    |
| 209                            | CC       |                             |          |    |    |
| 210                            | CT       |                             |          |    |    |
| 211                            | CT       |                             |          |    |    |
| 212                            | TT       |                             |          |    |    |
| 213                            | TT       |                             |          |    |    |
| 214                            | TT       |                             |          |    |    |
| 215                            | CT       |                             |          |    |    |
| 216                            | CT       |                             |          |    |    |
| 217                            | CT       |                             |          |    |    |
| 218                            | TT       |                             |          |    |    |
| 219                            | TT       |                             |          |    |    |
| 220                            | TT       |                             |          |    |    |
| 221                            | CT       |                             |          |    |    |
| 222                            | CT       |                             |          |    |    |
| 223                            | TT       |                             |          |    |    |
| 224                            | TT       |                             |          |    |    |
| 225                            | CT       |                             |          |    |    |
| 226                            | TT       |                             |          |    |    |
| 227                            | TT       |                             |          |    |    |
| 228                            | CC       |                             |          |    |    |
| 229                            | CC       |                             |          |    |    |
| 230                            | CT       |                             |          |    |    |
| 231                            | CT       |                             |          |    |    |
| 232                            | CT       |                             |          |    |    |
| 233                            | CT       |                             |          |    |    |
| 234                            | CC       |                             |          |    |    |
| 235                            | CT       |                             |          |    |    |
| 236                            | CT       |                             |          |    |    |
| 237                            | TT       |                             |          |    |    |
| 238                            | CC       |                             |          |    |    |
| 239                            | TT       |                             |          |    |    |
| 240                            | CT       |                             |          |    |    |
| 241                            | CT       |                             |          |    |    |
| 242                            | CT       |                             |          |    |    |
| 243                            | CT       |                             |          |    |    |
| 244                            | CT       |                             |          |    |    |

NC, neurologic comorbidity; DC, developmental comorbidity.
