# Supplementary material for: Genetic Polymorphism of ADORA2A Is Associated With the Risk of Epilepsy and Predisposition to Neurologic Comorbidity in Chinese Southern Children
Source: PubMed Central journal article supplement (PMC7686584; doi:10.3389/fnins.2020.590605), 2020-11-11
Supplement: Table_1.pdf [file Table_1.pdf]

**Supplementary table 1.** The information of variants investigated in this study.

| <b>Gene</b>    | <b>SNP</b> | <b>Alleles</b> | <b>Position</b>             | <b>Variation Type</b>       | <b>Functional Consequence</b>                                                            |
|----------------|------------|----------------|-----------------------------|-----------------------------|------------------------------------------------------------------------------------------|
| <i>ADORA2A</i> | rs2298383  | C>A,G,T        | chr22:24429543 (GRCh38.p12) | single nucleotide variation | Intron variant,<br>genic downstream transcript variant,<br>non-coding transcript variant |
| <i>BDNF</i>    | rs6265     | C>T            | chr11:27658369 (GRCh38.p12) | single nucleotide variation | Missense variant,<br>non-coding transcript variant,<br>coding sequence variant           |
| <i>NTRK2</i>   | rs1778929  | T>C            | chr9:84707625 (GRCh38.p12)  | single nucleotide variation | Intron Variant                                                                           |

**Supplementary table 2.** Functional enrichment analysis of fourteen *ADORA2A* target genes

| Category                | Term          | Description                            | LogP   | Log(q-value) | Genes                                                     |
|-------------------------|---------------|----------------------------------------|--------|--------------|-----------------------------------------------------------|
| GO Biological Processes | GO:0050878    | Regulation of body fluid levels        | -6.665 | -3.013       | ADA, ENTPD1, CREB1, SLC29A1, GNB1, P2RY2                  |
| Reactome Gene Sets      | R-HSA-9658195 | Leishmania infection                   | -6.632 | -3.013       | ENTPD1, CREB1, GNB1, IL10, NT5E, WDTC1, P2RY2             |
| GO Biological Processes | GO:0042451    | Purine nucleoside biosynthetic process | -6.565 | -3.013       | ADA, ADK, NT5E, ENTPD1, GDNF, RPIA                        |
| KEGG Pathway            | hsa05034      | Alcoholism                             | -5.550 | -2.273       | BDNF, CREB1, SLC29A1,GNB1                                 |
| GO Biological Processes | GO:1901215    | Negative regulation of neuron death    | -5.285 | -2.080       | BDNF, CREB1, GDNF, IL10, ADA, GRM5, SLC29A1, P2RY2, WDTC1 |
| Reactome Gene Sets      | R-HSA-416476  | G alpha (q) signalling events          | -5.236 | -2.063       | CREB1, GNB1, GRM5, P2RY2, WDTC1, IL10, ADA                |
| GO Biological Processes | GO:0007568    | Aging                                  | -4.570 | -1.613       | ADA, CREB1, GRM5, IL10, SLC29A1, NT5E, WDTC1              |
| GO Biological Processes | GO:0006836    | Neurotransmitter transport             | -3.324 | -0.783       | ADA, SLC29A1, GDNF, IL10                                  |
